# Supplementary material for: Silencing of Exosomal miR-181a Reverses Pediatric Acute Lymphocytic Leukemia Cell Proliferation
Source: Pharmaceuticals (Basel). 2020 Sep 11;13(9):241. doi: 10.3390/ph13090241 (PMC7558769; doi:10.3390/ph13090241)
Supplement: Supplementary file 1 [file pharmaceuticals-13-00241-s001.pdf]

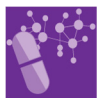

## Supplementary

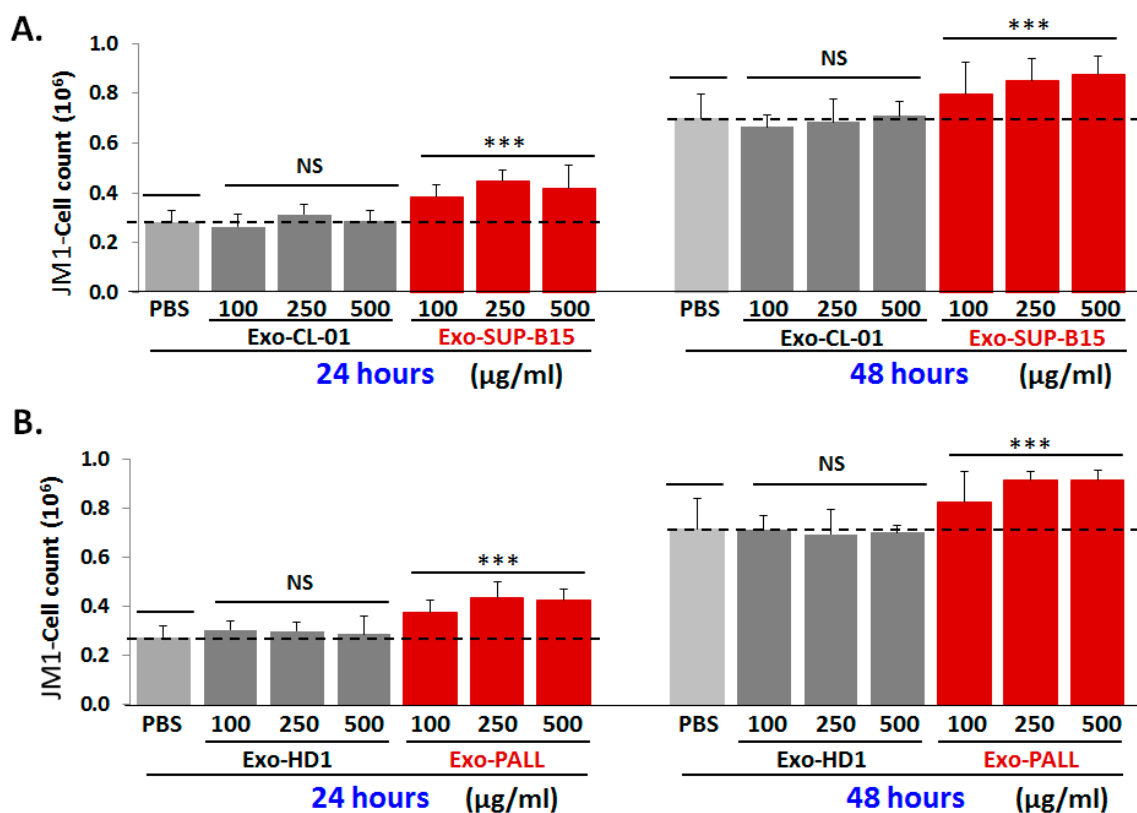

**Figure S1. Dose titration and time kinetics of exosomes enhancing cell proliferation.** (A) JM1 cells were treated with Exo-CL-01 (normal B cell line) and Exo-SUP-B15 (leukemia B cell line) in three different dosages (100, 250, 500 µg/ml). Cells were counted at 24 hours and 48 hours after treatment. (B) JM1 cells were loaded with Exo-HD and Exo-PALL in three different dosages (100, 250, 500 µg/ml) in JM1 cells. Cells were counted at 24 hours and 48 hours after treatment. Exosomes induced cell proliferation was present at optimal concentration of 250 µg/ml of exosomes. (*P* value \* *p*<0.05, \*\**p*<0.01, \*\*\**p*<0.001. NS; not significant).

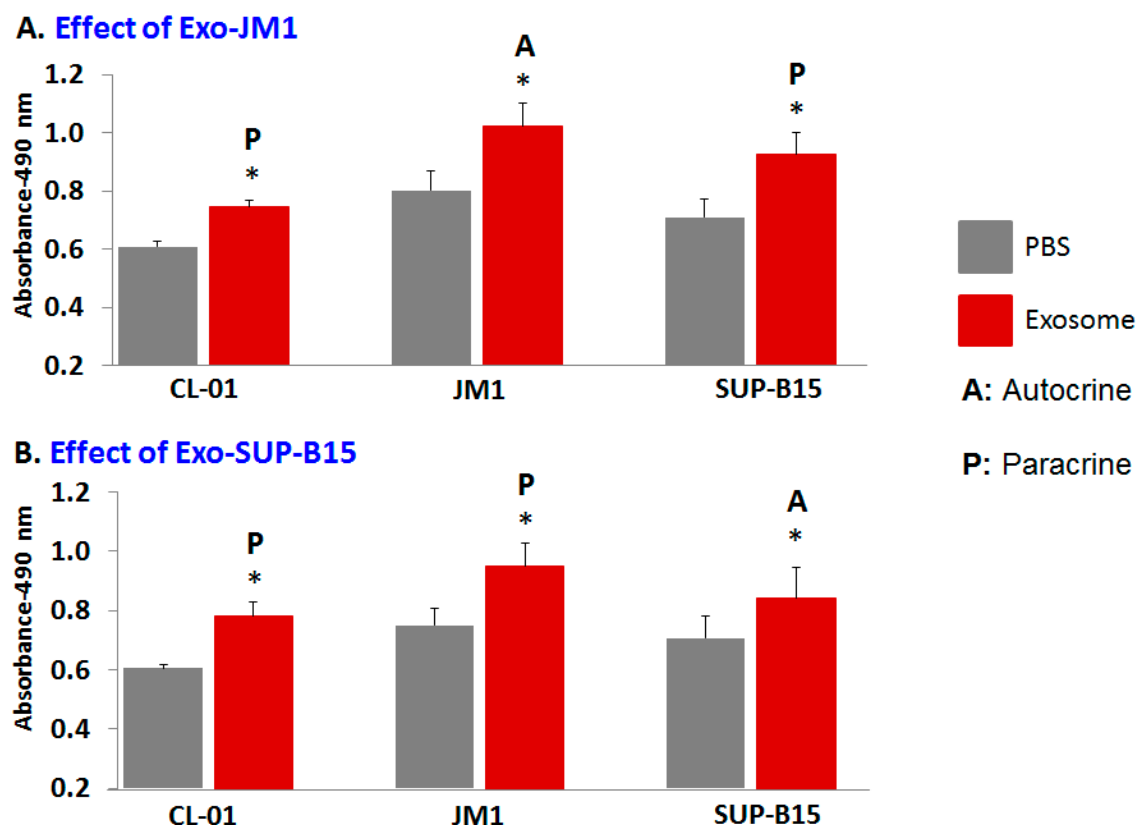

**Figure S2.** Exosomes induced cell proliferation by MTS assay. (A) CL-01, JM1, and SUP-B15 cells were plated ( $0.1 \times 10^6$ /well) in quadruplets. Exo-JM1 (JM1 cell-derived exosomes) was loaded ( $250 \mu\text{g/ml}$ ) on the CL-01, JM1, and SUP-B15 for 24 hours. Next day, MTS were added into the culture plate and plate was read at 490 nm. (B) CL-01, JM1, and SUP-B15 cells were plated ( $0.1 \times 10^6$ /well) in quadruplets. Exo-SUP-B15 (SUP-B15 cell-derived exosomes) was loaded ( $250 \mu\text{g/ml}$ ) on the CL-01, JM1, and SUP-B15 for 24 hours. Next day, cell proliferation was quantitated by MTS. Data was analyzed by PBS as control (P value \*  $p < 0.05$ , \*\*  $p < 0.01$ , \*\*\*  $p < 0.001$ . NS; not significant).

**A. Exo-JM1 on JM1 cells (Autocrine effect)**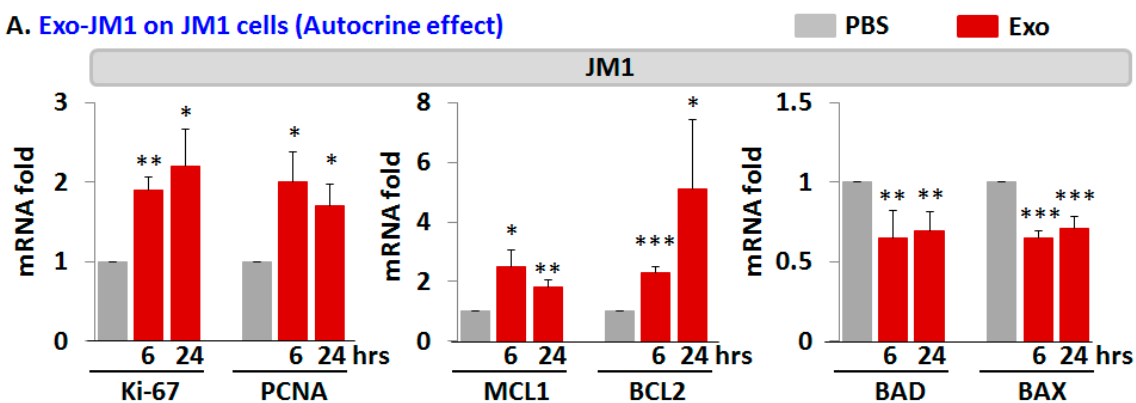**B. Exo-SUP-B15 on JM1 cells (Paracrine effect)**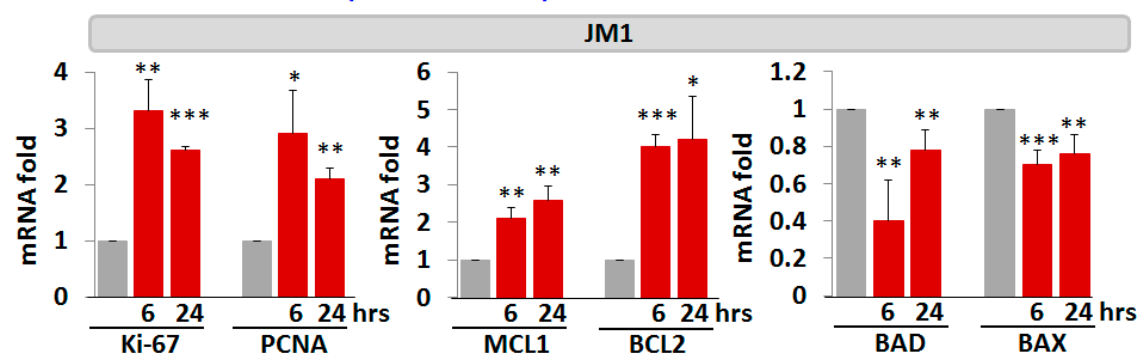

**Figure S3.** Exo-CM (JM1 and SUP-B15) regulates proliferative, pro-survival, and pro-apoptotic genes. (A) JM1 cells were exposed with Exo-JM1 (250 µg/ml) and cultured cells were harvested for RNA isolation at 6 hours and 24 hours post treatment. Indicated mRNA (Ki-67, PCNA, MCL1, BCL2, BAD, BAX) expression analyzed by q-PCR. (B) JM1 cells were exposed with Exo-SUP-B15 (250 µg/ml). Cells were harvested for RNA isolation at 6 and 24 hours after treatment. Indicated mRNA (Ki-67, PCNA, MCL1, BCL2, BAD, BAX) expression analyzed by q-PCR. Data represented are mean of three experiments. (Ctrl: PBS only/no exosomes- *P* value \**p*<0.05, \*\**p*<0.01, \*\*\**p*<0.001).

**Table S1.** List of healthy donors and PALL serum samples.

| <b>Healthy Donor #</b> | <b>Serum Sample Code</b>          |
|------------------------|-----------------------------------|
| 1                      | HD77                              |
| 2                      | HD78                              |
| 3                      | HD79                              |
| 4                      | HD80                              |
| <b>PALL patient #</b>  | <b>Serum Sample Code</b>          |
| 1                      | PALL01 D1                         |
|                        | PALL01 D29                        |
| 2                      | PALL02 D1                         |
|                        | PALL02 D29                        |
| 3                      | PALL14c relapse                   |
|                        | PALL14c 2 <sup>nd</sup> remission |
| 4                      | PALL24 relapse                    |
|                        | PALL24 2 <sup>nd</sup> remission  |
| 5                      | PALL14 relapse                    |
|                        | PALL14 2 <sup>nd</sup> remission  |
| 6                      | PALL25 D1                         |
| 7                      | PALL03                            |
| 8                      | PALL04                            |
| 9                      | PALL05                            |
| 10                     | PALL05b                           |
| 11                     | PALL14a                           |

**Table S2.** Human primers from universal probe library (UPL).

| <b>Genes</b> | <b>Accession #</b> | <b>Probe #</b> | <b>Primers sequences</b>           |
|--------------|--------------------|----------------|------------------------------------|
| PCNA         | J04718.1           | 77             | For: 5'-CTTTTTCGCGCCAAAGTC-3'      |
|              |                    |                | Rev: 5'-CTGCGGAAAAACCCTTGAT-3'     |
| Ki-67        | NM_002417.4        | 53             | For: 5'-CGCGTAAGTCAAGACCAAAAT-3'   |
|              |                    |                | Rev: 5'-GGTCAAGCTCTTGTTTCAGGTG-3'  |
| BAD          | AF031523.1         | 45             | For: 5'-ACCAGCAGCAGCCATCAT-3'      |
|              |                    |                | Rev: 5'-GGTAGGAGCTGTGGCGACT-3'     |
| BAX          | U19599.1           | 55             | For: 5'-CAAGACCAGGGTGGTTGG-3'      |
|              |                    |                | Rev: 5'-CACTCCCGCCACAAAGAT-3'      |
| MCL1         | AF118124.          | 4              | For: 5'-AAGCCAATGGGCAGGTCT-3'      |
|              |                    |                | Rev: 5'-TGTCCAGTTCCGAAGCAT-3'      |
| BCL2         | AY220759.1         | 23             | For: 5'-TTGGTATCCTTCTCTTTCAGCAC-3' |
|              |                    |                | Rev: 5'-ATGGCATTGACGAAGAGGAT-3'    |
| GAPDH        | NM_002046.3        | 60             | For: 5'-AGCCACATCGCTCAGACAC-3'     |
|              |                    |                | Rev: 5'-GCCCAATACGACCAAATCC-3'     |
